# Supplementary material for: Discovery of two novel Torque Teno viruses in Callithrix penicillata provides insights on Anelloviridae diversification dynamics
Source: Frontiers journal article supplement (doi:10.3389/fmicb.2022.1002963), 2022-09-08
Supplement: Data_Sheet_1.zip [file Data_Sheet_1.zip]

## Sheet: Values
	Strict		Relaxed
	PS	SS	PS	SS
Yule	-27230.8	-27230.6	-27230.9	-27230.7
Coalescent constant	-27236.5	-27236.2	-27236.7	-27236.4
Coalescent exponential	-27231.6	-27231.7	-27231.8	-27231.6
Coalescent skyline	-27233.1	-27232.9	-27233.6	-27233.4

## Sheet: PS_Sorted
-27230.6
-27230.7
-27231.6
-27231.7
-27232.9
-27233.4
-27236.2
-27236.4

## Sheet: SS_Sorted
-22915.6
-22916.7
-22918.3
-22918.6
-22919.3
-22921
-22922.4
-22923.3
